# Supplementary material for: Nonverbal Auditory Cues Allow Relationship Quality to be Inferred During Conversations
Source: J Nonverbal Behav. 2021 Oct 22;46(1):1–18. doi: 10.1007/s10919-021-00386-y (PMC8881250; doi:10.1007/s10919-021-00386-y)
Supplement: Supplementary file 7 — Supplementary file7 (XLSX 11 kb) [file 10919_2021_386_MOESM7_ESM.xlsx]

## Sheet: Recovered_Sheet1
Table S3. Results for individual audio clips in each condition
Register	Condition	Population	Language	% correct		% correct = Percent of subjects correctly identifying register for clip
Agreement	Delexicalised	Spain	English	15.9			[Expctation for random responding = 12.5%]
Agreement	Pitch only	Spain	English	21.7
Agreement	Audio	Spain	English	43.5
Agreement	Delexicalised	Spain	Spanish	11.6
Agreement	Pitch only	Spain	Spanish	13
Agreement	Audio	Spain	Spanish	24.6
Agreement	Delexicalised	UK	English	36.4
Agreement	Pitch only	UK	English	20.9
Agreement	Audio	UK	English	80
Agreement	Delexicalised	UK	Spanish	20.2
Agreement	Pitch only	UK	Spanish	38.2
Agreement	Audio	UK	Spanish	80
Sustained	Delexicalised	Spain	English	40.6
Sustained	Pitch only	Spain	English	21.7
Sustained	Audio	Spain	English	46.4
Sustained	Delexicalised	Spain	Spanish	23.2
Sustained	Pitch only	Spain	Spanish	13
Sustained	Audio	Spain	Spanish	59.4
Sustained	Delexicalised	UK	English	33.3
Sustained	Pitch only	UK	English	30.9
Sustained	Audio	UK	English	9.5
Sustained	Delexicalised	UK	Spanish	16.7
Sustained	Pitch only	UK	Spanish	15.3
Sustained	Audio	UK	Spanish	14.6
Phatic	Delexicalised	Spain	English	21.7
Phatic	Pitch only	Spain	English	17.4
Phatic	Audio	Spain	English	18.8
Phatic	Delexicalised	Spain	Spanish	7.2
Phatic	Pitch only	Spain	Spanish	11.6
Phatic	Audio	Spain	Spanish	56.5
Phatic	Delexicalised	UK	English	32.5
Phatic	Pitch only	UK	English	29.7
Phatic	Audio	UK	English	26.3
Phatic	Delexicalised	UK	Spanish	36.4
Phatic	Pitch only	UK	Spanish	21.2
Phatic	Audio	UK	Spanish	31.2
Pos-provoke	Delexicalised	Spain	English	30.4
Pos-provoke	Pitch only	Spain	English	7.2
Pos-provoke	Audio	Spain	English	23.2
Pos-provoke	Delexicalised	Spain	Spanish	14.5
Pos-provoke	Pitch only	Spain	Spanish	5.8
Pos-provoke	Audio	Spain	spanish	47.8
Pos-provoke	Delexicalised	UK	English	26
Pos-provoke	Pitch only	UK	English	20.8
Pos-provoke	Audio	UK	English	20.7
Pos-provoke	Delexicalised	UK	Spanish	12.3
Pos-provoke	Pitch only	UK	Spanish	8.5
Pos-provoke	Audio	UK	Spanish	42.3
Enforced	Delexicalised	Spain	English	10.1
Enforced	Pitch only	Spain	English	5.8
Enforced	Audio	Spain	English	26.1
Enforced	Delexicalised	Spain	Spanish	1.4
Enforced	Pitch only	Spain	Spanish	5.8
Enforced	Audio	Spain	Spanish	11.6
Enforced	Delexicalised	UK	English	34.4
Enforced	Pitch only	UK	English	28.6
Enforced	Audio	UK	English	6.6
Enforced	Delexicalised	UK	Spanish	0
Enforced	Pitch only	UK	Spanish	8.3
Enforced	Audio	UK	Spanish	10.2
Disagree	Delexicalised	Spain	English	46.4
Disagree	Pitch only	Spain	English	33.3
Disagree	Audio	Spain	English	65.2
Disagree	Delexicalised	Spain	Spanish	33.3
Disagree	Pitch only	Spain	Spanish	18.8
Disagree	Audio	Spain	Spanish	52.2
Disagree	Delexicalised	UK	English	5.6
Disagree	Pitch only	UK	English	50
Disagree	Audio	UK	English	66
Disagree	Delexicalised	UK	Spanish	54.2
Disagree	Pitch only	UK	Spanish	49
Disagree	Audio	UK	Spanish	69.6
Gossip	Delexicalised	Spain	English	24.6
Gossip	Pitch only	Spain	English	5.8
Gossip	Audio	Spain	English	71
Gossip	Delexicalised	Spain	Spanish	15.9
Gossip	Pitch only	Spain	Spanish	2.9
Gossip	Audio	Spain	Spanish	47.8
Gossip	Delexicalised	UK	English	64.5
Gossip	Pitch only	UK	English	19
Gossip	Audio	UK	English	48.1
Gossip	Delexicalised	UK	Spanish	36.4
Gossip	Pitch only	UK	Spanish	21.6
Gossip	Audio	UK	Spanish	72.5
Neg-provoke	Delexicalised	Spain	English	18.8
Neg-provoke	Pitch only	Spain	English	34.8
Neg-provoke	Audio	Spain	English	21.7
Neg-provoke	Delexicalised	Spain	Spanish	34.8
Neg-provoke	Pitch only	Spain	Spanish	27.5
Neg-provoke	Audio	Spain	Spanish	4.3
Neg-provoke	Delexicalised	UK	English	22.4
Neg-provoke	Pitch only	UK	English	43.6
Neg-provoke	Audio	UK	English	51.7
Neg-provoke	Delexicalised	UK	Spanish	40
Neg-provoke	Pitch only	UK	Spanish	41.58
Neg-provoke	Audio	UK	Spanish	35.6
